# Supplementary material for: Creation of hierarchical structures within membranes by incorporating mesoporous microcapsules for enhanced separation performance and stability
Source: Royal Society of Chemistry journal article supplement (doi:10.1039/c3ta14665k), 2014-01-01
Supplement: c3ta14665k1.pdf [file c3ta14665k1.pdf]

## Supporting Information

Creation of hierarchical structures within membranes by incorporating mesoporous microcapsules for enhanced separation performance and stability

By *Wanpeng Liu, Shen Hu, Guanhua Liu, Fusheng Pan, Hong Wu, Zhongyi Jiang\*, Baoyi Wang, Zhuoxin Li and Xingzhong Cao*

[\*] Prof. Z. Jiang, Dr. W. Liu, S. Hu, G. Liu, F. Pan, H. Wu  
Collaborative Innovation Center of Chemical Science and Engineering (Tianjin); Key Laboratory for Green Chemical Technology of Ministry of Education, School of Chemical Engineering and Technology, Tianjin University, Tianjin 300072, China  
E-mail: zhyjiang@tju.edu.cn

Prof. B. Wang, Z. Li, X. Cao  
Key Laboratory of Nuclear Analysis Techniques, Institute of High Energy Physics, Chinese Academy of Sciences, Beijing 100049, China

---

1. Molecular structures of dopamine and Ti-BALDH

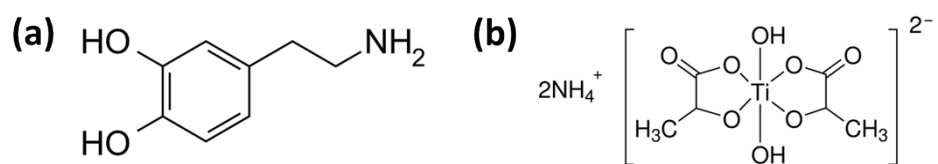

**Figure S1** Molecular structures of (a) dopamine and (b) Ti-BALDH.

## 2. Schematic of the mineralization process upon removing the template

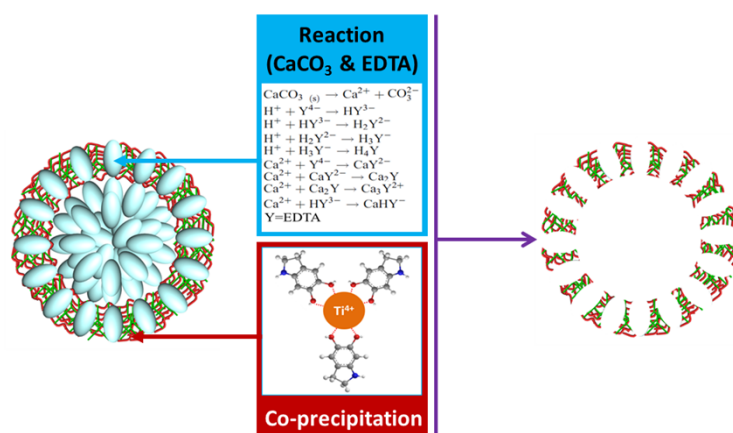

**Figure S2** Schematic of the mineralization process upon removing the CaCO<sub>3</sub> template

### 3. SEM image of the microcapsules

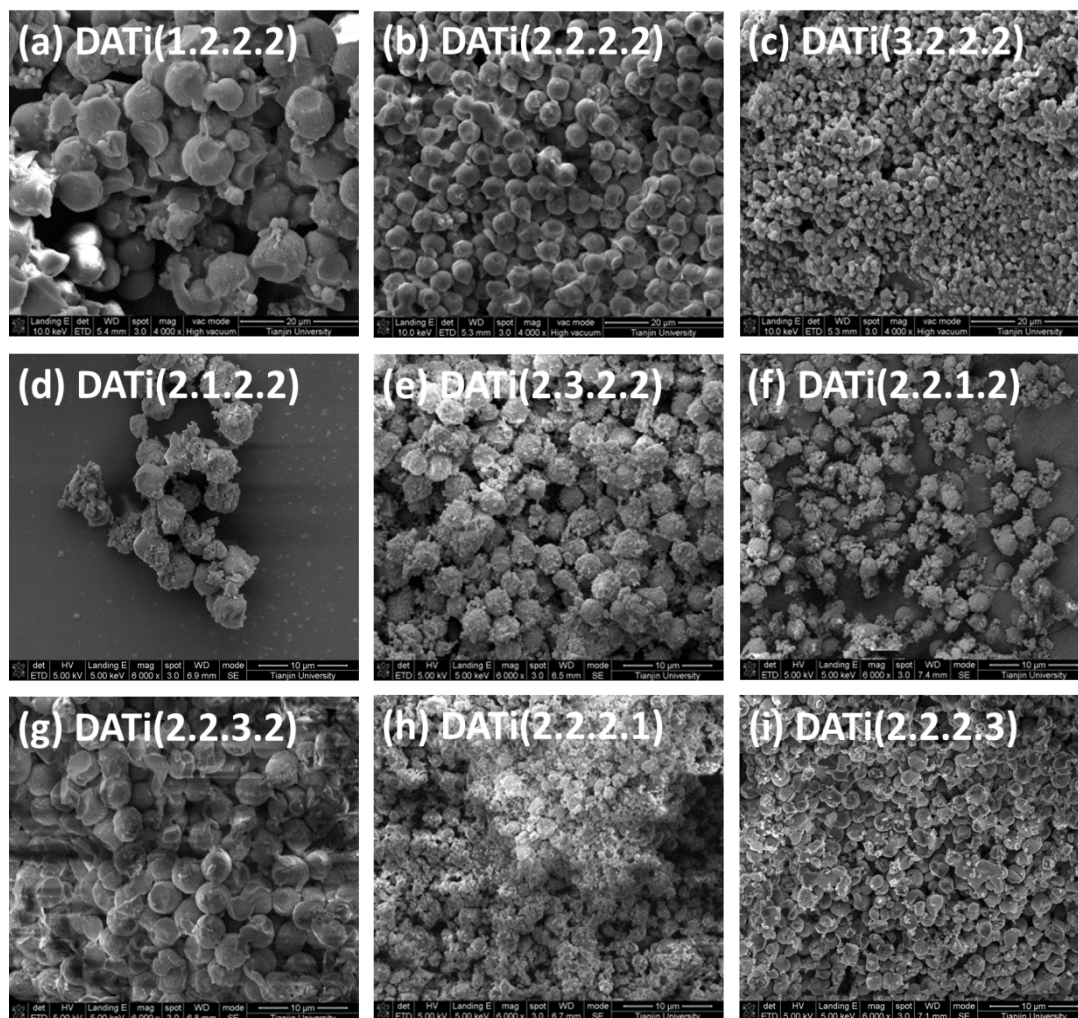

**Figure S3.** SEM image of the DATi microcapsules with different synthesizing conditions.

---

#### 4. FTIR spectra analysis of the membranes

The FTIR spectra of the PDMS control and PDMS-DATi membranes were recorded in **Figure 5(a)**. The characteristic peak at about  $788\text{ cm}^{-1}$  was corresponded to the stretching vibrations of Si-C in the membranes. The characteristic peaks appeared at around  $1009$  and  $1084\text{ cm}^{-1}$  represented the stretching vibrations of Si-O-Si. The characteristic peak at about  $1257\text{ cm}^{-1}$  assigned to the deformation vibrations of the two  $-\text{CH}_3$  linked with Si. The weak absorption peaks around  $1410$  and  $2960\text{ cm}^{-1}$  were the dissymmetry deformation vibrations of  $-\text{CH}_3$  joined with Si and stretching vibrations of C-H, respectively. The FTIR spectra of the PDMS-DATi membranes did not generate new absorption peaks compared with the PDMS control membrane, revealing that the DATi microcapsules were physically blended within the PDMS matrix.

---

### 5. TGA measurements of the microcapsules

The TGA of DATi microcapsules was shown in **Figure 9**. The thermal decomposition of DATi microcapsules could be divided into three stages. The first stage indicated a loss of 3.2 wt%, between 40 and 150 °C, attributed to the elimination of adsorbed water on the surface of microcapsules. The second stage indicated a loss of 12.4 wt%, between 150 and 670 °C, probably due to the decomposition of polymerized dopamine in the microcapsules. And the third stage from 670 to 800 °C was the decomposition of dopamine chelated on the Ti-O-Ti frameworks. The superior thermal stability of DATi microcapsules was arisen from the steady Ti-O-Ti frameworks and strong metal-organic coordination between Ti(IV) and dopamine.

---

6. *FTIR spectra of the DATi(2.1.2.2), DATi(2.2.2.2) and DATi(2.3.2.2) microcapsules*

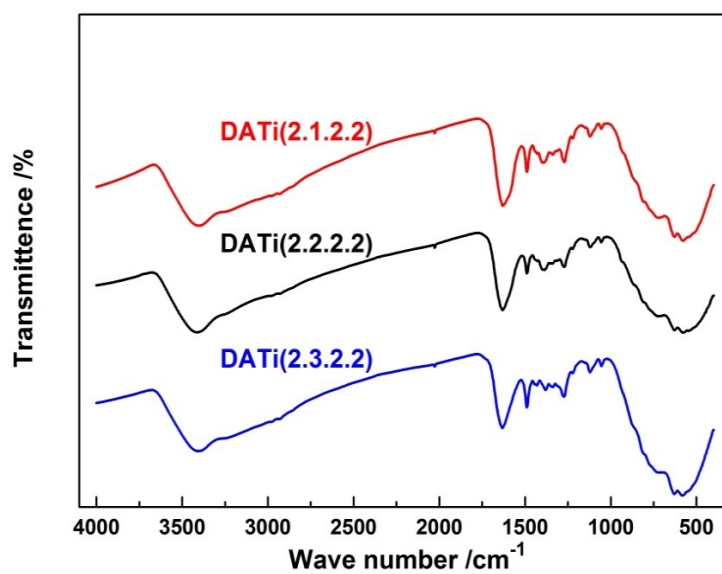

**Figure S4.** FTIR spectra of the DATi(2.1.2.2), DATi(2.2.2.2) and DATi(2.3.2.2) microcapsules.

7. Arrhenius relationship for permeation of *n*-octane and thiophene through the membranes

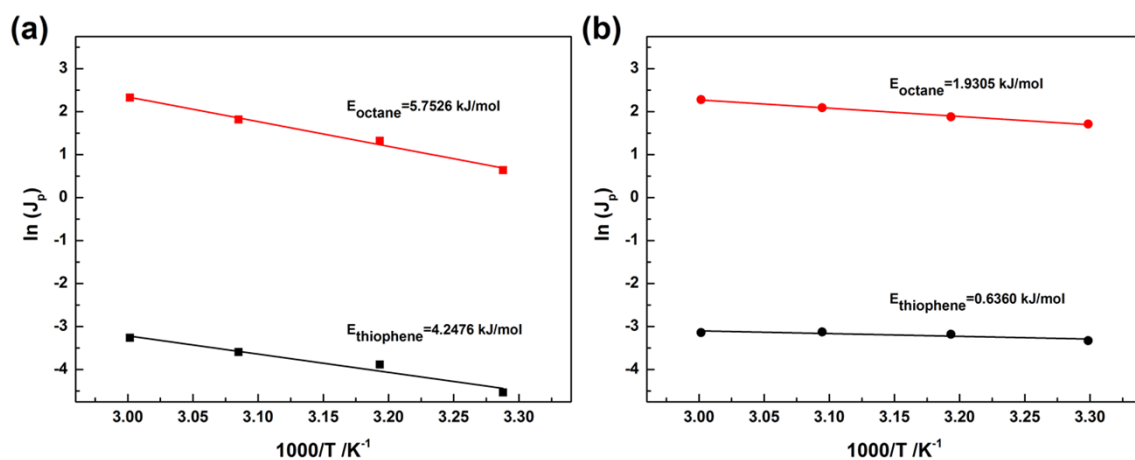

**Figure S5.** Arrhenius plots of permeation flux for separation of thiophene/*n*-octane mixture by (a) PDMS control and (b) PDMS-DATi membranes for a feed of 1,500 ppmw thiophene in *n*-octane with a flow rate of 40 L h<sup>-1</sup>.
